# Supplementary material for: Organo-sulfur molecules enable iron-based battery electrodes to meet the challenges of large-scale electrical energy storage
Source: Royal Society of Chemistry journal article supplement (doi:10.1039/c4ee01454e), 2014-06-18

Supplementary Material: Impedance Spectroscopy Data

1-dodecanthiol #1

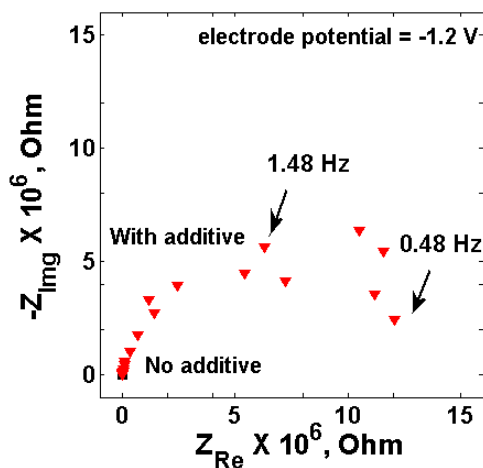

1-octanethiol #2

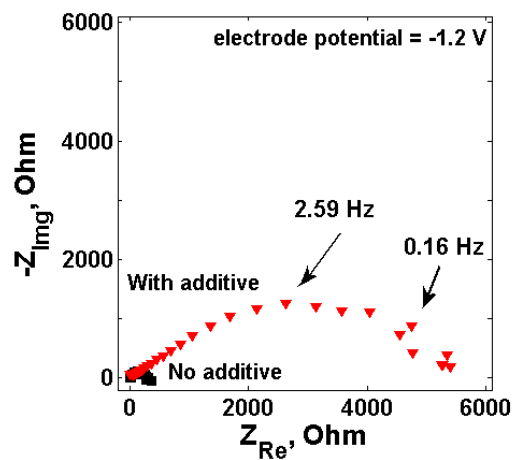

1-propanethiol #3

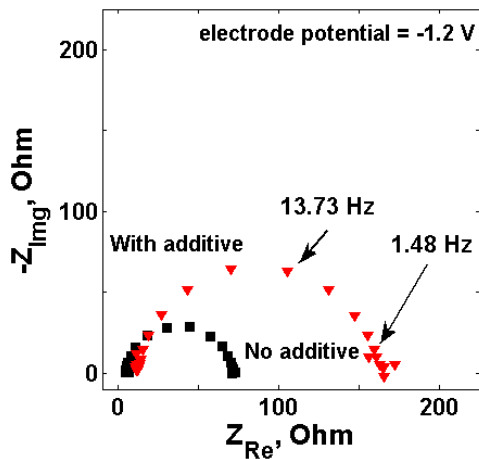

## 1,2-dithanethiol #5

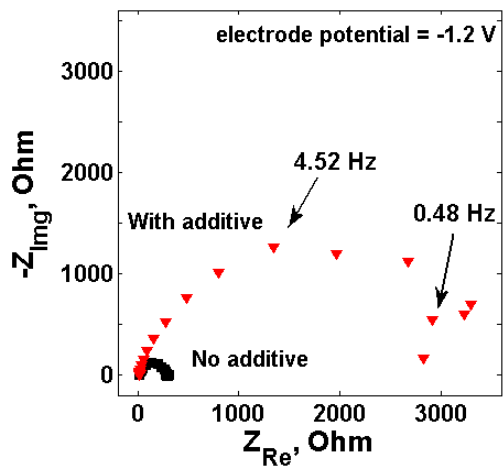

## 1,4-dithiane #6

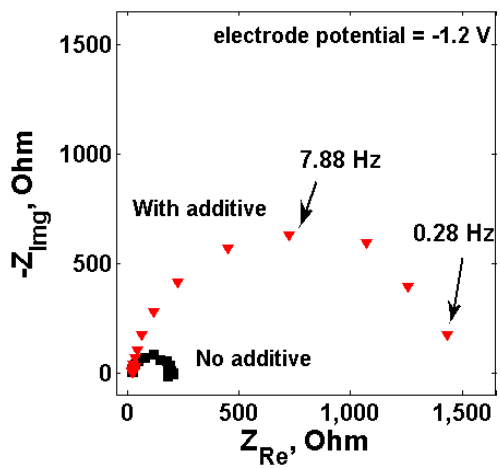

## Bismethyldithiomethane #7

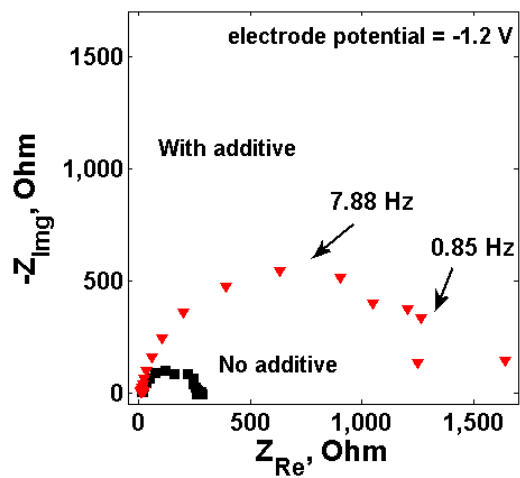

benzenethiol #8

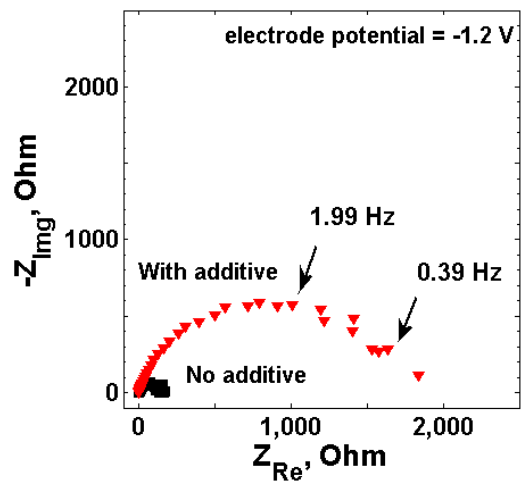

2-methylbenzenethiol #9

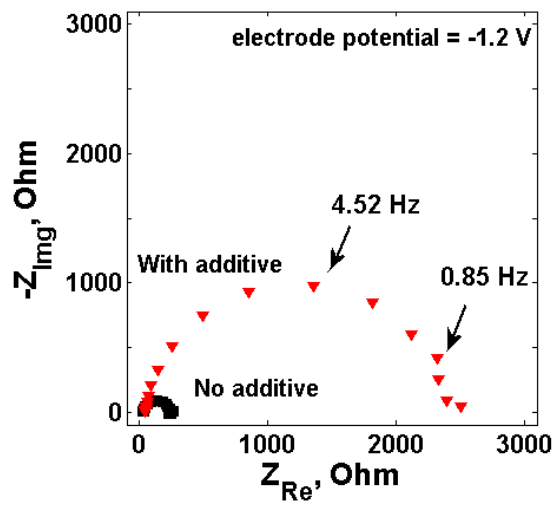

Supplement: c4ee01454e1.pdf [file c4ee01454e1.pdf]
